# Supplementary material
Source: publisher figshare collection journal article supplement (https://acs.figshare.com/ndownloader/files/13666031)
Supplement: Supplementary file 1 [file 13666031]

# **Supplementary Information: Silk molecular weight influences the kinetics of enzymatically crosslinked silk hydrogel formation**

A. Pasha Tabatabai<sup>a,b</sup>, Benjamin P. Partlow<sup>c</sup>, Nicole R. Raia<sup>c</sup>, David L. Kaplan<sup>c</sup>, and Daniel L. Blair<sup>a,b\*</sup>

*<sup>a</sup>Georgetown University Department of Physics*

*<sup>b</sup>Institute for Soft Matter Synthesis and Metrology*

*<sup>c</sup>Tufts University Department of Biomedical Engineering*

*6 figures, 4 pages*

E-mail: [dlb76@georgetown.edu](mailto:dlb76@georgetown.edu)

Kinetic rheological measurements of the storage modulus ( $G'(t)$ ) and loss modulus ( $G''(t)$ ) are done at a fixed frequency of 1 Hz and strain amplitude 1%. Although we cannot directly show that these parameters correspond to a point in the linear viscoelastic (LVE) regime of the polymerizing gel, we perform strain amplitude and frequency sweeps to confirm that  $G'(t)$  is measured in the LVE regime of the fully polymerized gels [Figure SS1].

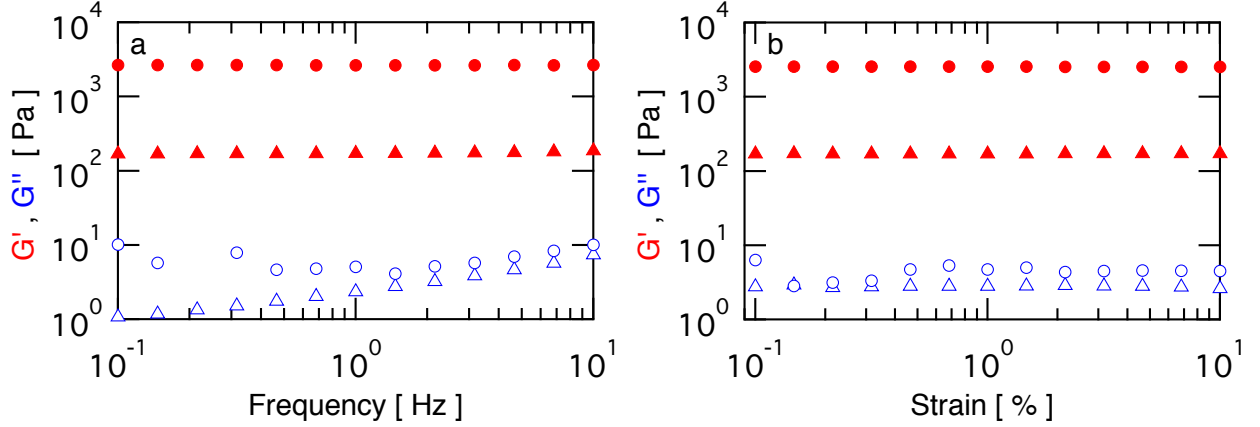

Figure S1:  $G'$  (solid symbols) and  $G''$  (open symbols) as a function of frequency (a) and strain amplitude (b) of fully polymerized 340 kDa (circles) and 110 kDa (triangles) protein gels at  $c = 25$ . Note: the absolute values of  $G'$  and  $G''$  vary amongst different silk batches.

Inflection points of  $G'(t)$  are used to define the timescales  $t_c$ ,  $t_p$ , and  $t_f$ . The critical time at which the modulus starts to grow is  $t = t_c$  and is determined by the local maximum of  $d^2G'/dt^2$ . When  $t_c$  is small, this method of defining  $t_c$  picks out the first point.  $t = t_p$  is the time at which percolation ends and is defined by the local minimum in  $d^2G'/dt^2$ .  $G'$  completes growth at  $t = t_f$ .

The raw polymerization curves for 340 kDa [Figure SS2] and 110 kDa [Figure SS3] gels for different concentrations of silk  $c$  show the relationships amongst  $G'$ ,  $G''$ , and the normal force. At short times, either  $G' \sim G''$  or  $G' > G''$  depending on interfacial effects. At the end of polymerization,  $G' \sim 100 \times G''$  signifying that the hydrogel is elastic.

The growth of  $G'(t)$  transitions from  $\alpha_1$  to  $\alpha_2$  growth at  $t = t_p$  for the 340 kDa gels. A consistent feature of the normal force evolution also occurs at  $t = t_p$ ; the normal force hits a local minimum [Figure SS2].

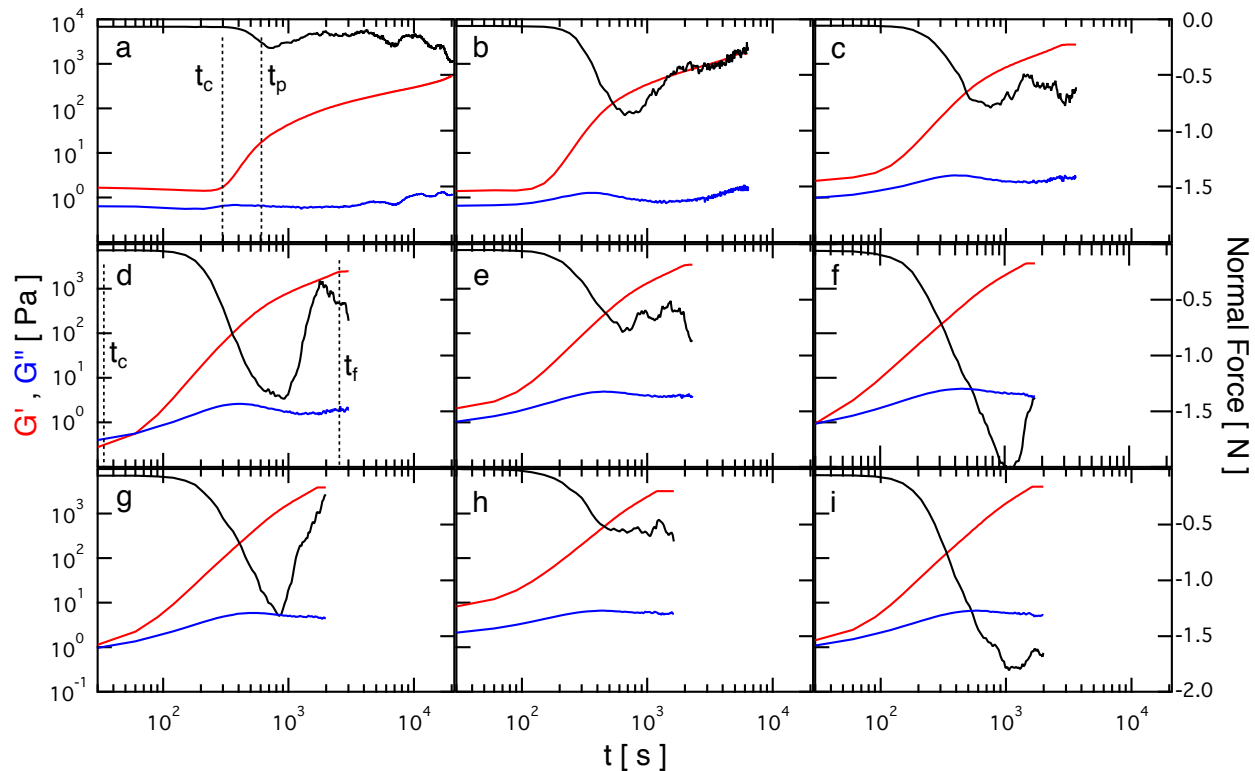

Figure S2:  $G'$  (red),  $G''$  (blue), and NF (black) as a function of time during polymerization of 340 kDa gels. (a-i) Concentrations of silk corresponding to  $c = 5, 10, 15, 20, 25, 30, 32, 34, \& 36 \text{ mg mL}^{-1}$ .

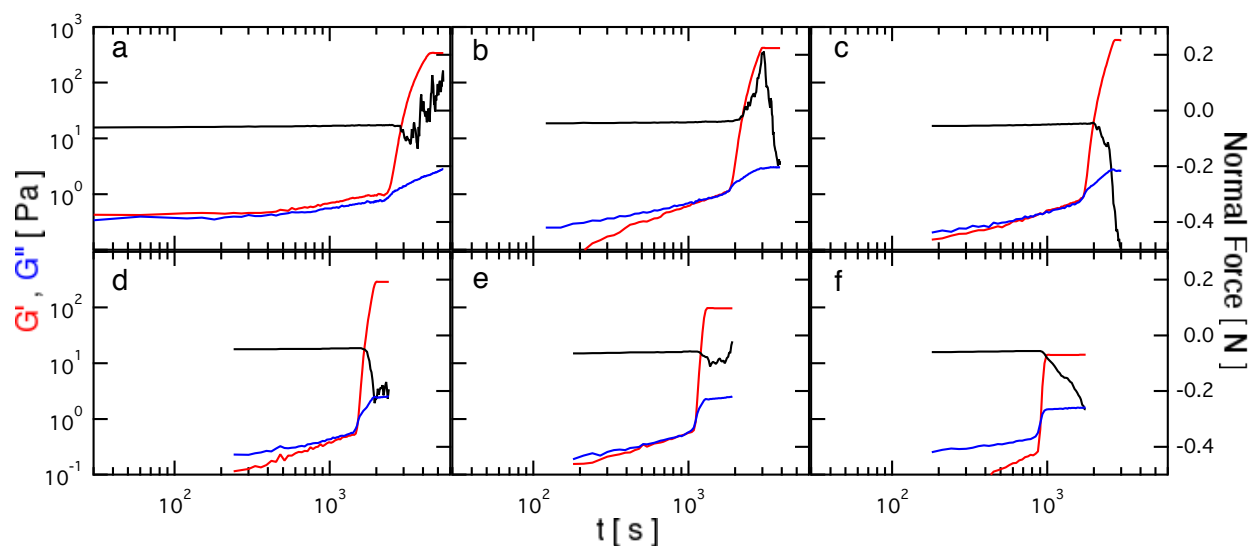

Figure S3:  $G'$  (red),  $G''$  (blue), and NF (black) as a function of time during polymerization of 110 kDa gels. (a-f) Concentrations of silk corresponding to  $c = 15, 20, 30, 40, 50, \& 55 \text{ mg mL}^{-1}$ .

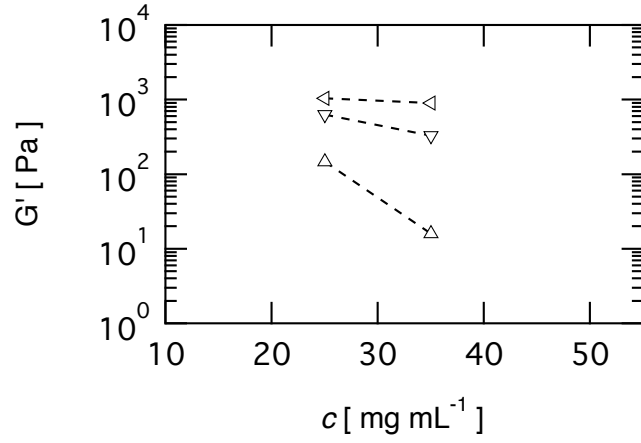

Figure S4:  $G'(t_f)$  for 110 kDa gels made with  $\text{H}_2\text{O}_2$  concentrations of 0.005% ( $\triangle$ ), 0.0075% ( $\nabla$ ), and 0.01% ( $\triangleleft$ ). Note: slight differences exist in  $G'(t_f)$  between these data and Figure 1 due to protein batch differences.

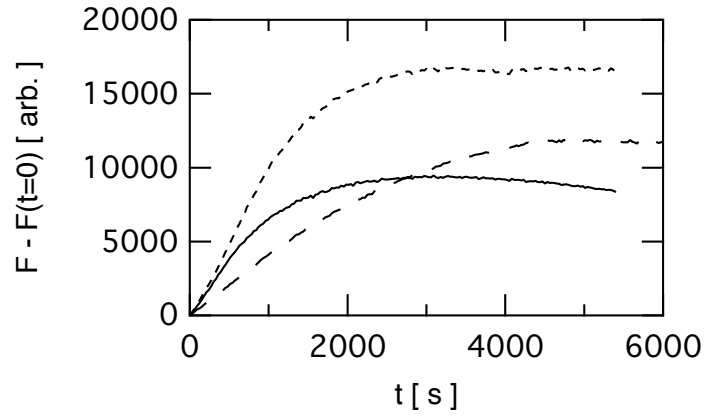

Figure S5:  $c = 5$  for 340 kDa (solid line),  $c = 10 \text{ mg mL}^{-1}$  for 340 kDa (short dashed line) and  $c = 15 \text{ mg mL}^{-1}$  for 110 kDa (long dashed line) gels

The fluorescence intensity  $F(t)$  represented on a linear scale shows that the lowest concentrations for 340 kDa gels have a slight decrease in  $F$  after the maximum, whereas the 110 kDa gels plateau at the maximum [Figure SS5].

Circular dichroism is done to monitor changes in secondary structure during polymerization [Figure SS6]. For both 340 kDa and 110 kDa gels, the ellipticity is unchanged during polymerization.

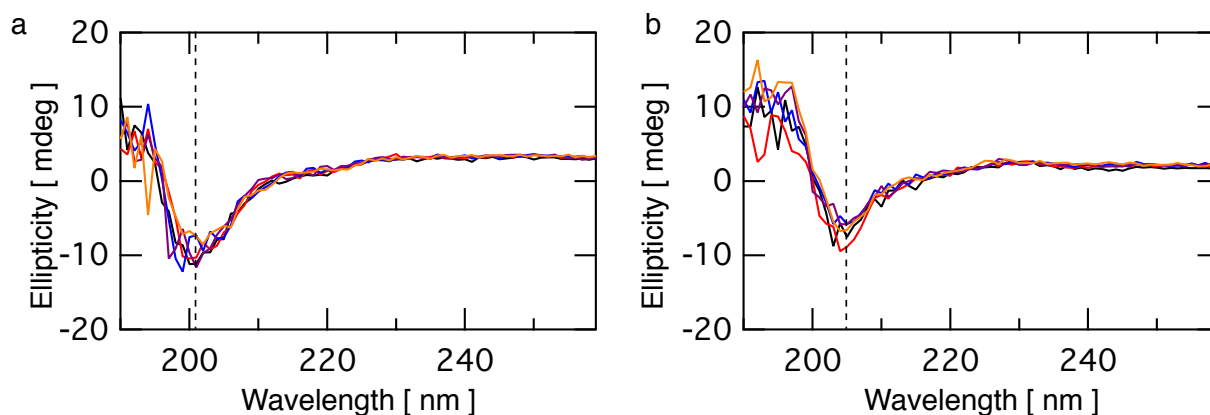

Figure S6: Ellipticity as a function of time from 0 min to 120 min (various colored lines) during polymerization for 340 kDa (a) and 110 kDa (b) gels as measured by circular dichroism is most closely aligned with a random coil configuration. Dashed lines are a guide to the eye. The ellipticity does not evolve during polymerization. The shift in the minimum between 340 kDa and 110 kDa, that exists from  $t = 0$  onwards, is likely due to the difference in possible configurations due to differing molecular weight.
